# Supplementary material
Source: HighWire-hosted journal article supplement (http://www.jneurosci.org/highwire/filestream/598355/field_highwire_adjunct_files/1/Supplemental_Fig_2.pdf)

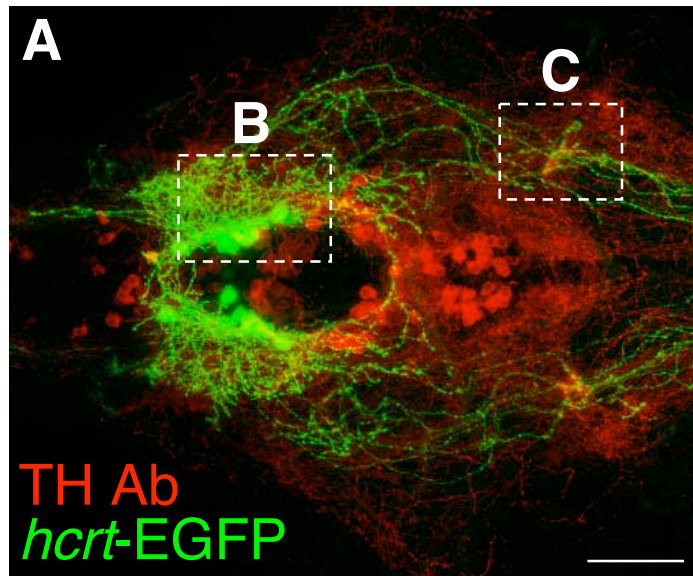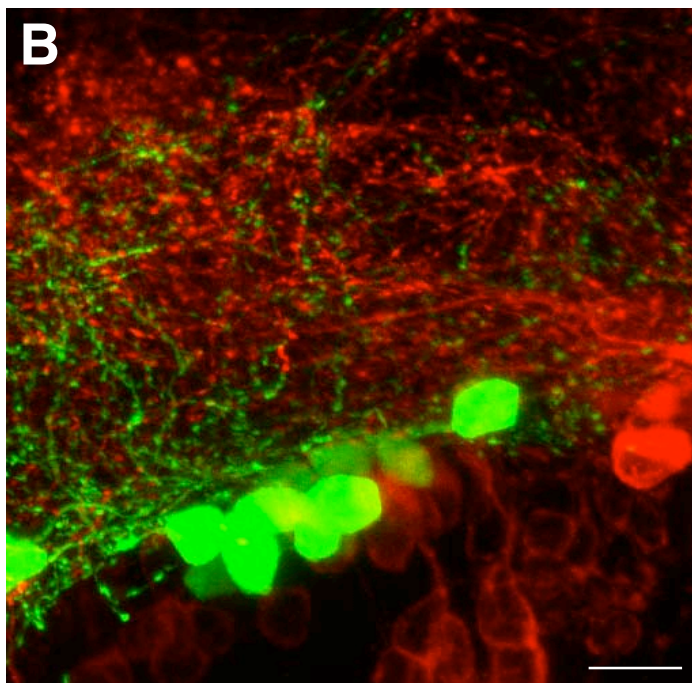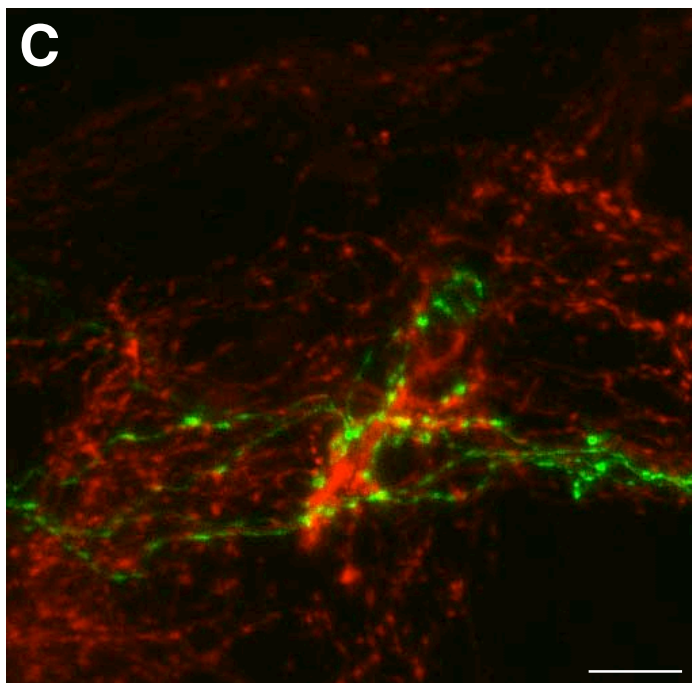

Supplement: Supplemental_Fig_2.pdf [file Supplemental_Fig_2.pdf]
